# Supplementary material for: Silencing of Neuropilins and GIPC1 in pancreatic ductal adenocarcinoma exerts multiple cellular and molecular antitumor effects
Source: Sci Rep. 2019 Oct 29;9:15471. doi: 10.1038/s41598-019-51881-8 (PMC6820541; doi:10.1038/s41598-019-51881-8)

## **Supplementary Information**

### **Silencing of Neuropilins and GIPC1 in pancreatic ductal adenocarcinoma exerts multiple cellular and molecular antitumor effects**

Hannes Borchardt<sup>1</sup>, Alexander Schulz<sup>2</sup>, Kaustubh Datta<sup>3</sup>, Michael Muders<sup>4,5\*</sup> and Achim Aigner<sup>1,5\*</sup>

<sup>1</sup> Rudolf-Boehm-Institute for Pharmacology and Toxicology, Clinical Pharmacology, Medical Faculty, University of Leipzig, Germany

<sup>2</sup> Institute of Pathology, University Hospital Carl Gustav Carus, University of Technology, Dresden, Germany

<sup>3</sup> Department of Biochemistry, University of Nebraska Medical Center, Omaha, Nebraska, USA

<sup>4</sup> Rudolf-Becker-Laboratory for Prostate Cancer Research, Institute of Pathology, University of Bonn Medical Center, Bonn, Germany

<sup>5</sup> Corresponding authors

\* contributed equally as senior and corresponding authors

## **Suppl. Materials and Methods**

### *Soft agar assay*

For soft agar assays, cells were seeded in 12 well plates 24 h prior to transfection. 48 h after transfection, cells were trypsinized (Trypsin-EDTA; Biowest, Nuaille, France) to obtain a single cell suspension and counted. For soft agar preparation, an autoclaved 2.4% agar solution (Carl Roth, Karlsruhe, Germany) and cell culture media were placed in a water bath to reach 42°C. A mixture of 12.5 mL agar solution, 1.25 mL MEM (10x) and 37.5 mL RPMI (10% FCS) were pipetted as bottom layer into a 6-well plate. For the top layer, 1 mL of a  $6 \times 10^4$  cells/mL single cell suspension was mixed with 1.5 mL of the agar mixture, and 750  $\mu$ L/well of this mixture was directly pipetted onto the bottom agar. Plates were incubated for 2 - 4 weeks and colonies  $> 50 \mu$ m in diameter were counted by 2 blinded investigators.

### *Colony formation assay*

For colony formation assays,  $1 \times 10^3$  cells in 2 ml culture medium were seeded in triplicates in a 6-well plate and cultivated for 7 - 9 days. Subsequently, cell culture medium was removed and cells were washed with 1 mL PBS, prior to adding 1 mL clonogenic reagent (0.5% methylene blue (w/v) in 50:50 (v/v) ethanol/water) to each well and incubating at room temperature for 45 min. Cells were washed at least 3 times with water prior to image acquisition under the microscope. Images were analyzed with the ImageJ software for quantitation of blue stained cells.

### *Scratch Assay*

$3.5 \times 10^5$  Panc89 cells / well were seeded in a 6-well plate 24 h prior to transfection. After transfection with 10 nM siRNA, the cells were further cultivated under standard conditions, and when they reached 100% confluency after 2 days, a scratch in the cell layer was introduced using a 200  $\mu$ L tip. The cell layer was washed twice with PBS and once with cell culture medium to remove floating cells, prior to adding 2 mL cell culture medium to each well. The plate was placed in a microscopic chamber set to 37°C and 5% CO<sub>2</sub>, and cell invasion into the scratches was documented automatically over 24 h at three different positions per scratch via a microscope, with pictures taken every 5 min. The percentage of scratch closure over time was quantitated using the ImageJ software and calculated relatively to t=0.

### *Caspase Assay and Annexin V staining*

For caspase assays, cells were seeded and transfected as described above, and after 48 - 96 h 50  $\mu$ L of the caspase-3/7-Glo reagent, diluted 1:10 or 1:5 in serum free medium depending on the cell line, was added to each well. After 1 h of incubation at room temperature in the dark, luminescence was measured by using a Fluostar Optima reader (BMG Labtec, Ortenberg, Germany). To normalize for different cell densities upon transfection, a WST-1 assay for quantitating viable cells was run in

parallel on the same plate. WST-1 was diluted 1:10 in serum free medium and 50  $\mu$ L of this mixture was added to each well. After incubation at 37°C and 5% CO<sub>2</sub> for 1 h, the plates were measured at 450 nm in a DigiScan plate reader (Asys Hitech, Eugendorf, Austria). By calculating the ratio caspase activity / WST-1 signal, the caspase signal was adjusted to the cell density.

For Annexin V staining, cells were transfected as described above and harvested at different time points (48 - 96 h), prior to washing twice in ice cold PBS, resuspending at  $1 \times 10^6$  cells/mL in 1x annexin binding buffer (10 mM HEPES, 140 mM NaCl, and 2.5 mM CaCl<sub>2</sub>, pH 7.4) and addition of 5  $\mu$ L of annexin V conjugate to each 100  $\mu$ L cell suspension. During a 15 min incubation at room temperature, 5  $\mu$ L propidium iodide (PI) solution (1 mg/mL) was diluted in 395  $\mu$ L 1x annexin binding buffer per sample. 400  $\mu$ L PI solution was added to each reaction tube and the cell suspension was incubated for further 5 min on ice in the dark. Samples were kept on ice until measurement in an Attune® Acoustic Focusing Cytometer (Thermo Scientific, Schwerte, Germany).

#### *Cell Cycle Analysis*

At 2 - 3 days post transfection, cells were treated for 14 - 20 h, depending on the cell line, with 25 ng/mL nocodazole in standard cell culture medium. Cells were harvested, washed once with PBS and fixed with 1 mL cold 70% ethanol for at least 1 h at -20°C. After fixation, the cells were spun down (1,000 rpm, 5 min) and washed once with ice-cold PBS, prior to resuspension in 50  $\mu$ g/mL RNaseI solution in PBS and incubation for 1 h at 37°C. During incubation, 5  $\mu$ L propidium iodide (PI; 1 mg/mL) were diluted in 345  $\mu$ L PBS for each sample. The PI solution was added to the reaction tube and the cell suspension was incubated for further 5 min on ice in the dark. Samples were kept on ice until measured in an Attune® Acoustic Focusing Cytometer. The cell cycle distribution was determined using the Attune® Cytometric Software.

#### *Western blotting*

Lysates were prepared from cells in 6-well plates by adding 100  $\mu$ L RIPA buffer and were homogenized by drawing the lysate up and down through a needle, using a 1 mL syringe. After centrifugation at 10,000 rpm for 10 min at 4°C, the supernatant was transferred to a new tube. Protein concentrations were measured using the Pierce BCA Protein Assay Kit (Thermo Scientific) according to the manufacturer's protocol and calculated from a bovine serum albumin standard curve.

For sodium dodecyl sulfate polyacrylamide gel electrophoresis (SDS-PAGE), samples containing 40  $\mu$ g protein were mixed with NuPAGE LDS sample buffer (Thermo Scientific) containing 5%  $\beta$ -mercaptoethanol (Sigma-Aldrich), heat denatured and loaded onto a precast NuPAGE 4-12% Bis-Tris gradient gel (Life Technologies) placed in an XCell SureLock Mini-Cell system (Invitrogen). After electrophoresis in NuPage MOPS buffer (Life Technologies) at 4°C for 3 hours at 120V, bands were

electroblotted onto a methanol activated PVDF membrane (Bio-Rad, Munich), using a PROTEAN Tetra Cell transfer system (Bio-Rad) for wet blotting, with NuPage blotting buffer (Life Technologies) containing 20% methanol. The blotting was performed at 80 V for 3 h or at 20 V overnight at 4°C. After blotting, the membrane was washed once with TBS-T (Tris-buffered saline (pH 7.4) + 0,05% Tween-20) and incubated for 1 h in 5 % milk powder in TBS for blocking of non-specific binding sites. Primary antibodies were diluted in 5 mL blocking solution as detailed in Suppl. Table 3 and used for membrane overnight incubation at 4°C. After washing three times with TBS-T, membranes were incubated in the secondary antibody dilution for 2 h at 4°C, followed by three additional washing steps. ECL substrate or, for higher sensitivity, Dura substrate (both Thermo Scientific) were used for visualization of protein bands. After exposure of X-ray films (GE Healthcare), bands were quantitated using the ImageJ software.

## **Supplementary Figure legends**

**Suppl. Fig. 1.** (A) Expression levels are independent of cell confluency and FCS supplementation, and of housekeeping genes used for normalization. (B) Comparison of target gene knockdown mediated by different siRNAs, as determined by mRNA levels in Colo357 cells. (C) Knockdown of target gene mRNA mediated by optimal siRNAs, as determined in Colo357 cells. (D) Western blots demonstrating the reduction of target gene protein levels in AsPC1 (upper panel) and Colo357 cells (lower panel).

**Suppl. Fig. 2.** (A) Colony formation assays in Panc89 cells. (B) Caspase activation in Panc1 cells 72 h after knockdown. (C) Time-dependent scratch closure in a wound healing assay (Panc89 cells).

**Suppl. Fig. 3.** (A) Flow cytometry-based determination of apoptotic AsPC1 (left) or Colo357 cells (right) 72 h after transfection. (B) LDH release assay in Panc89 cells. (C) Anchorage-dependent proliferation assay in Colo357 cells. (D) Caspase activation in Colo357 cells 72 h after knockdown.

**Attached also scans of original full immunoblots.**

## **Supplementary Tables**

**Suppl. Table 1.** Sequences of siRNAs used in this study

**Suppl. Table 2.** Sequences of primers used in this study

**Suppl. Table 3.** Antibodies used in this study

**A**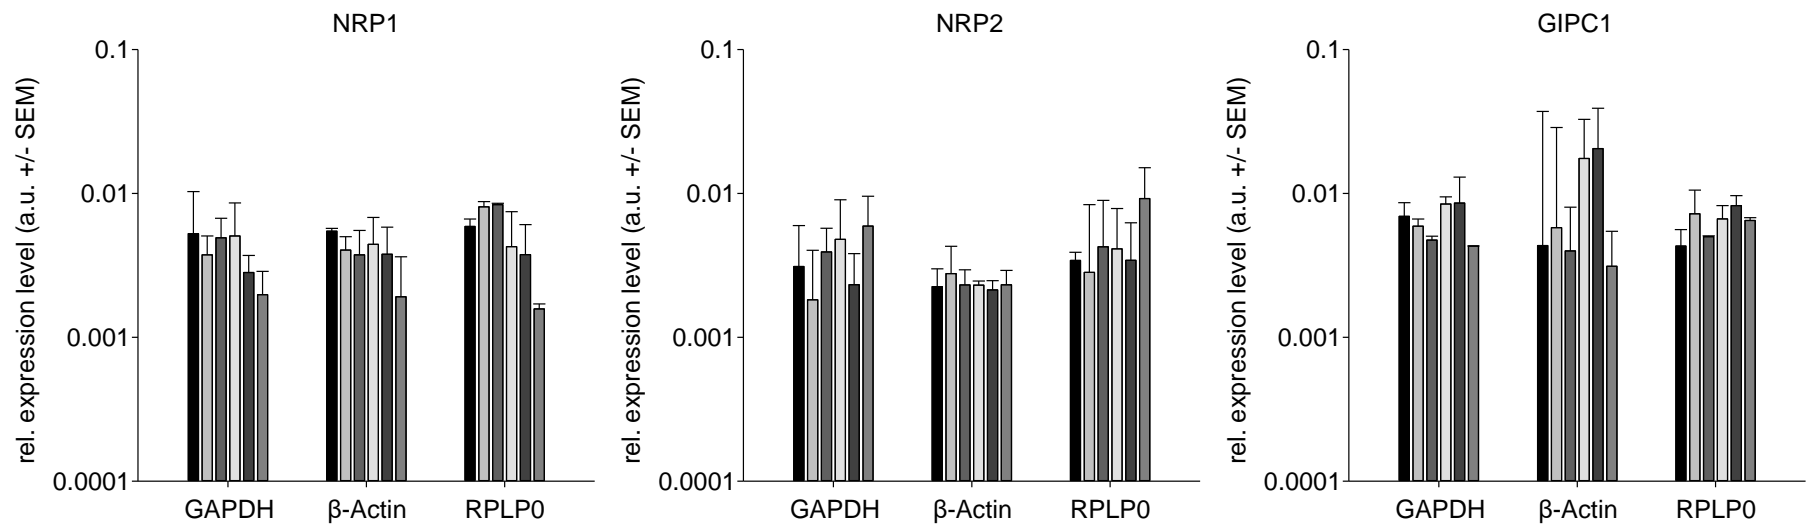**B**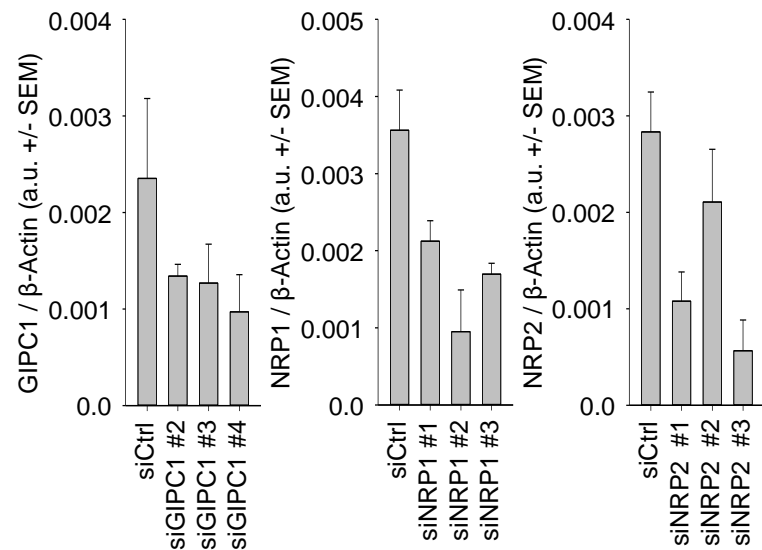**C**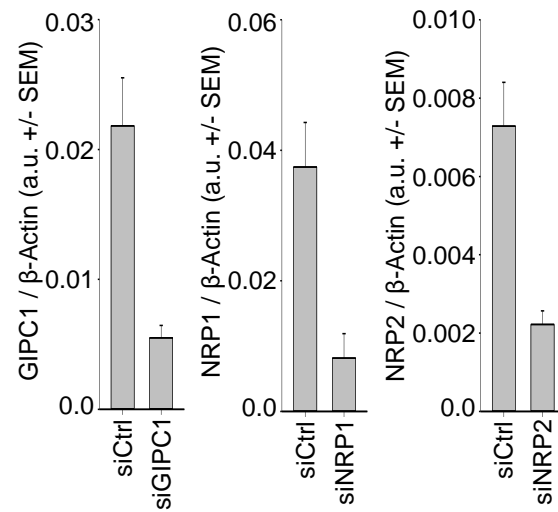**D**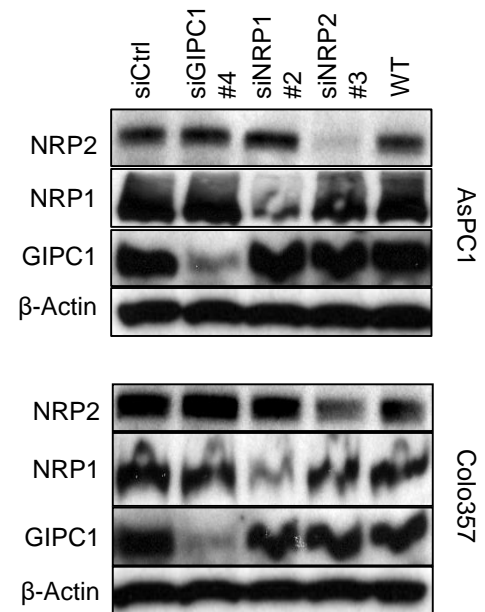

**A**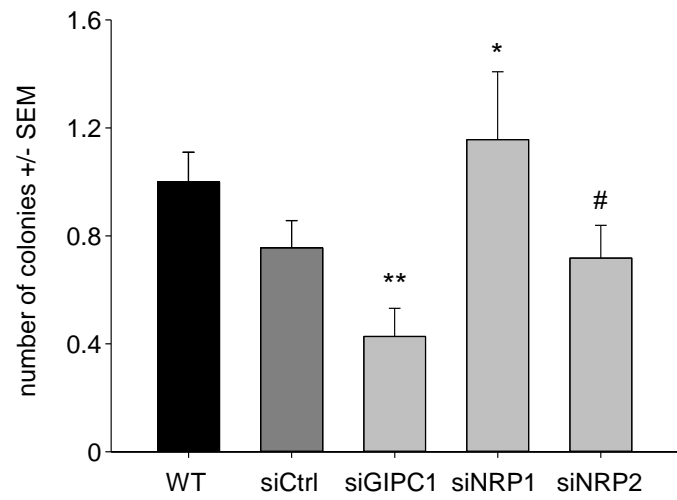**B**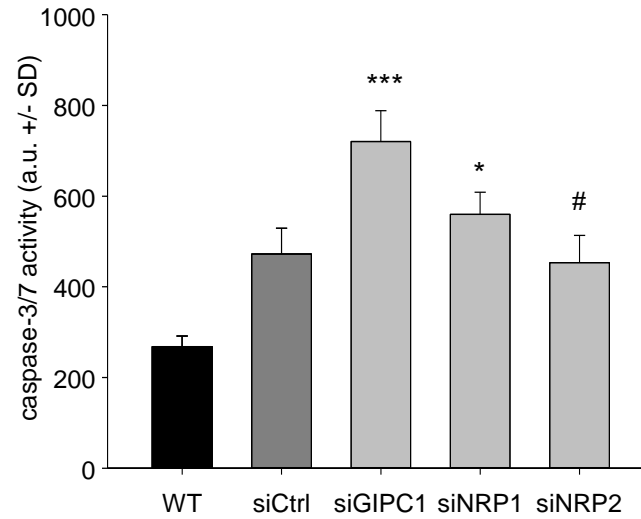**C**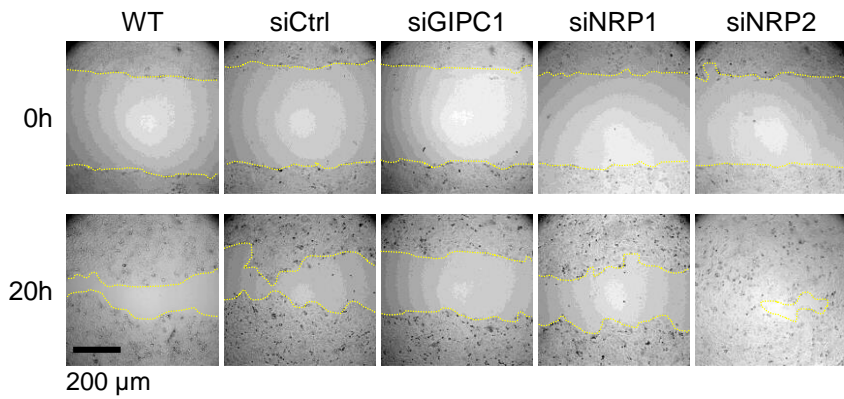

**A**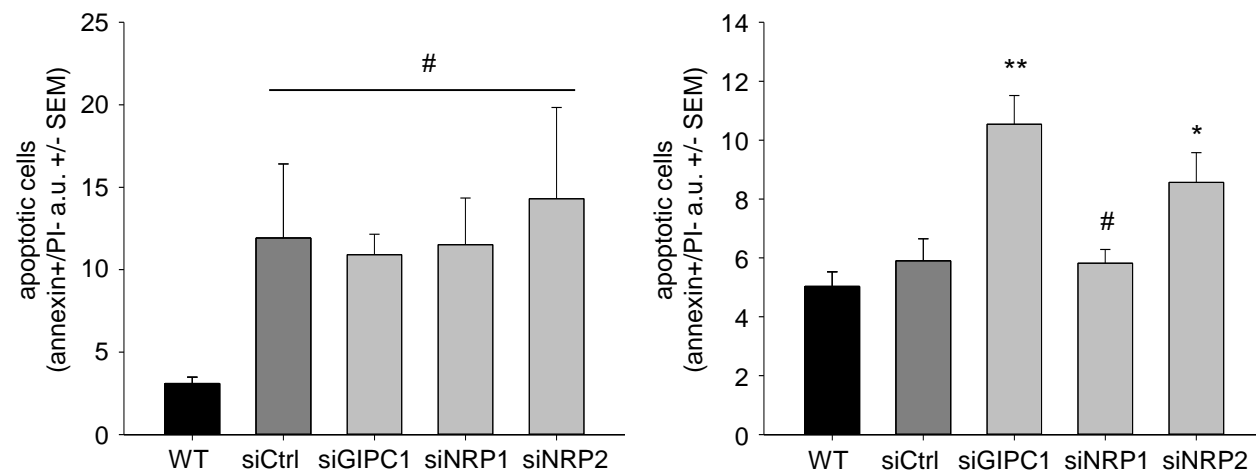**B**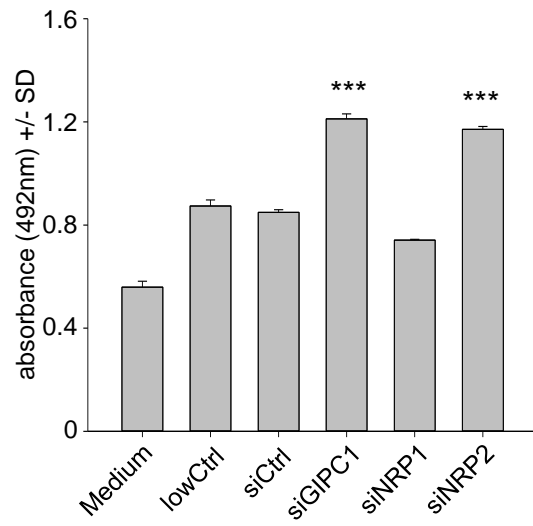**C**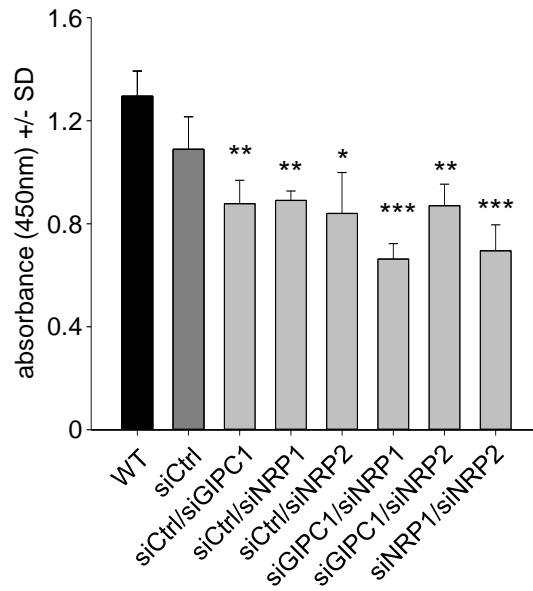**D**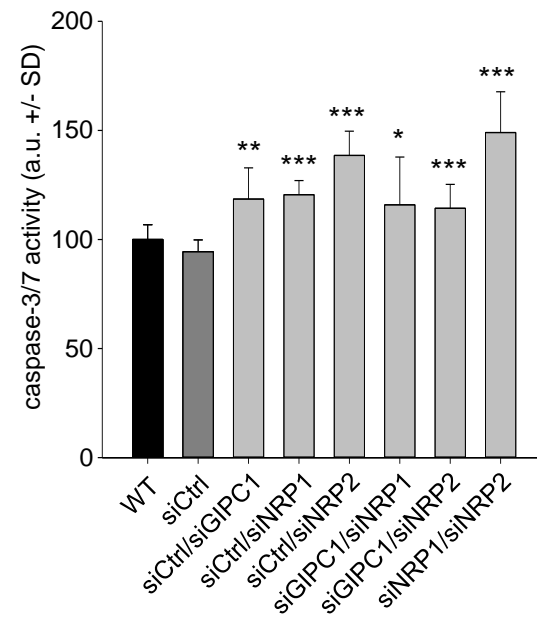

Suppl. Table 1. Sequences of siRNAs used in this study

| Name      | siRNA ID | Sense                  | Antisense             |
|-----------|----------|------------------------|-----------------------|
| siGIPC1#2 | 256501   | AUCUAUCUGGCUGUUGGAAAtt | UUUCCAACAGCAGAUAGAUtc |
| siGIPC1#3 | 290345   | CCUGCUGGAGAGUUACAUGtt  | CAUGUAACUCUCCAGCAGGtc |
| siGIPC1#4 | 16786    | GGCCAUUGAGAAGGUGGAUtt  | AUCCACCUUCUCAAUGGCCtt |
| siNRP1#1  | 107269   | GGCGAACUCUUUUGAGGGCtt  | GCCCUCAAAAGACUUCGCCtt |
| siNRP1#2  | 4914     | GGAUUUCCAUACGUUAUGtt   | CAUAACGUAUGGAAAAUCCtg |
| siNRP1#3  | 107268   | GGAGAAAUUCAUUCUGACCtt  | GGUCAGAAUGAAUUUCUCCtg |
| siNRP2#1  | 115159   | GCCACUAGAGAACUUUCAGtt  | CUGAAAGUUCUCUAGUGGCtc |
| siNRP2#2  | 107266   | GGUUUGUUAGAAUCCGCCtt   | GGGCGGAUUCUAACAAACCtt |
| siNRP2#3  | 107264   | GGUCGUUUGAAUCCAAAGtt   | CUUUGGAAUUCAAACGACCtc |
| siCtrl    |          | CUUACGCUGAGUACUUCGAtt  | UCGAAGUACUCAGCGUAAtt  |

Suppl. Table 2. Sequences of primers used in this study

| Name           | Forward-Sequence        | Reverse-Sequence       |
|----------------|-------------------------|------------------------|
| GIPC1          | ACGTCAAGGAGCTGTATGGC    | CCTCCGACTTGAACACCTCC   |
| NRP1           | CCCCAAACCACTGATAACTCG   | GTCCAGACACCATAACCAACAT |
| NRP2           | AGGTGGACTGGAGCAATTCTTC  | AGCTCTTTTCTTTGTCGGTCGA |
| $\beta$ -Actin | CCAACCGCGAGAAGATGA      | CCAGAGGCGTACAGGGATAG   |
| GAPDH          | AGCCACATCGCTCAGACAC     | GCCCAATACGACCAAATC C   |
| RPLP0          | TCTACAACCCTGAAGTGCTTGAT | CAATCTGCAGACAGACACTGG  |

Suppl. Table 3. Antibodies used in this study

| PRIMARY ANTIBODIES                                   |                     |                |             |                                                                    |
|------------------------------------------------------|---------------------|----------------|-------------|--------------------------------------------------------------------|
| Antibody                                             | Target Raised       | Manufacturer   | Application | Dilution                                                           |
| Human NRP2                                           | Goat                | R&D            | WB<br>IF    | 1:400<br>1:250                                                     |
| Human NRP1                                           | Rabbit              | Abcam          | WB          | 1:1000                                                             |
| Human GIPC1                                          | Mouse               | Santa Cruz     | WB          | 1:500                                                              |
| Human b-Actin                                        | Mouse               | Abcam          | WB          | 1:50000                                                            |
| SECONDARY ANTIBODIES                                 |                     |                |             |                                                                    |
| Anti-goat, HRP-conjugated                            | Donkey              | Dianova        | WB          | 1:10000                                                            |
| Anti-mouse, HRP-conjugated                           | Goat                | Abcam          | WB          | 1:10000                                                            |
| Anti-rabbit, HRP-conjugated                          |                     | Cell Signaling | WB          | 1:10000                                                            |
| ANTIBODIES FOR IMMUNOHISTOCHEMISTRY IN FFPE MATERIAL |                     |                |             |                                                                    |
| Neuropilin-1                                         | Rabbit              | Abcam          | IHC-P       | 1:200 (microwaved antigen retrieval with TRIS/EDTA buffer, pH 9.0) |
| Neuropilin-2                                         | Mouse               | Santa Cruz     | IHC-P       | 1:100 (microwaved antigen retrieval in TRIS/EDTA buffer, pH 6.0)   |
| GIPC1                                                | Goat                | Abcam          | IHC-P       | 10µg/ml (microwaved antigen retrieval in TRIS/EDTA, pH 9.0)        |
| Cleaved Caspase-3                                    | Rabbit              | Zytomed        | IHC-P       | 1:200 (heat induced antigen retrieval in citrate buffer, pH 6.0)   |
| Ki67                                                 | Mouse (clone MIB-1) | Dako           | IHC-P       | Ready to use antibody                                              |

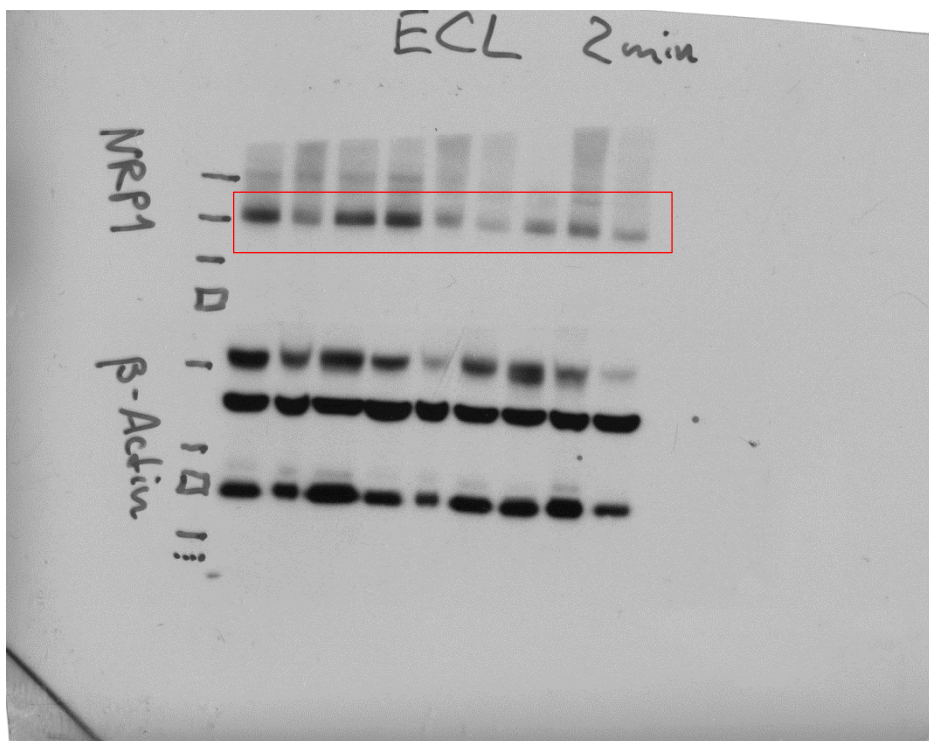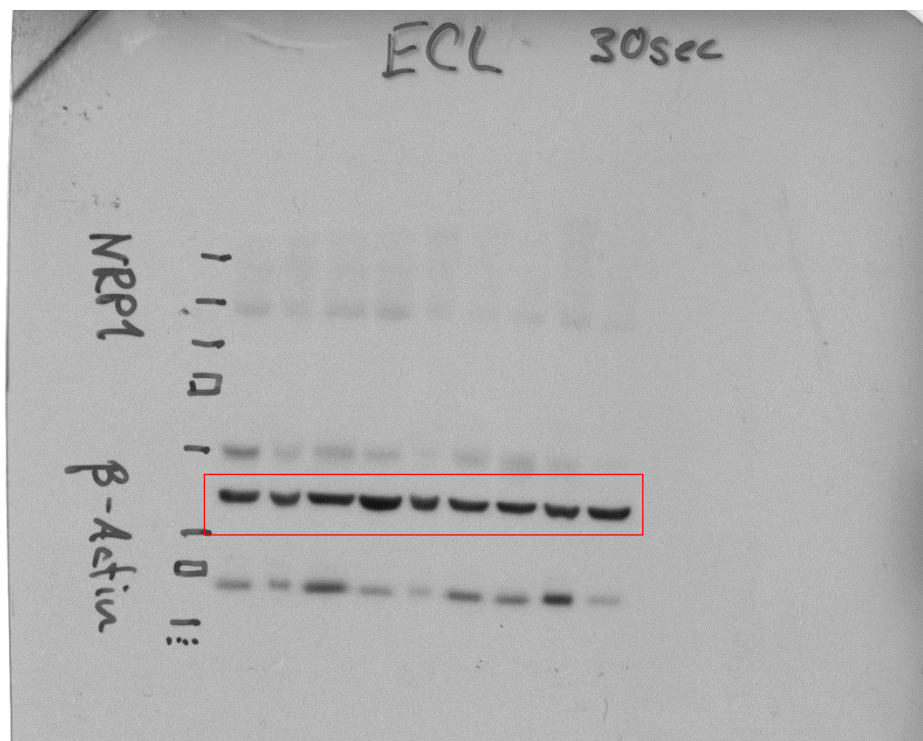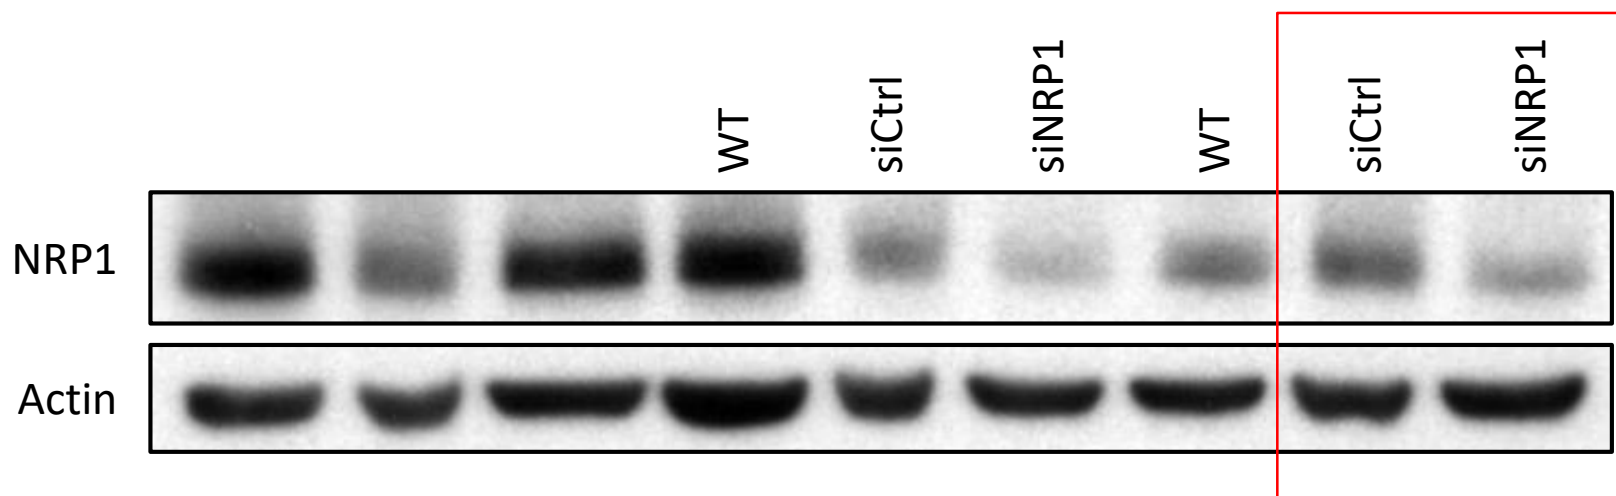

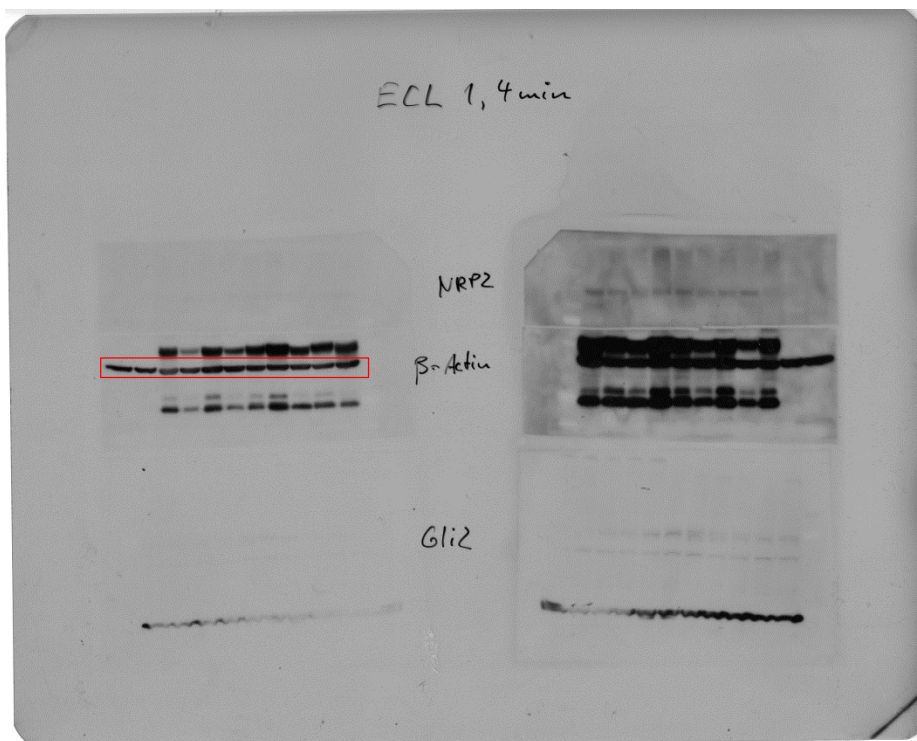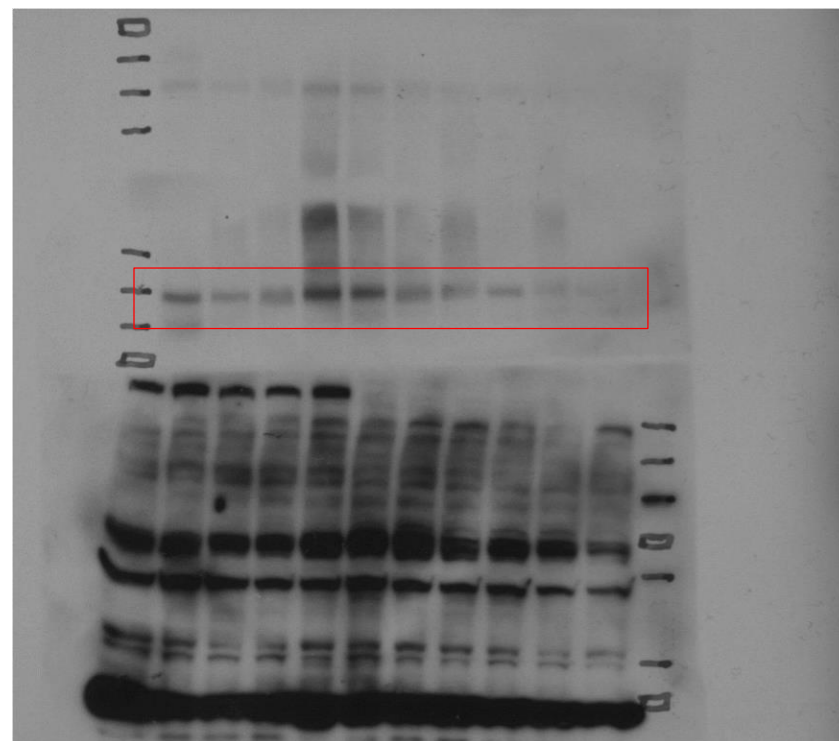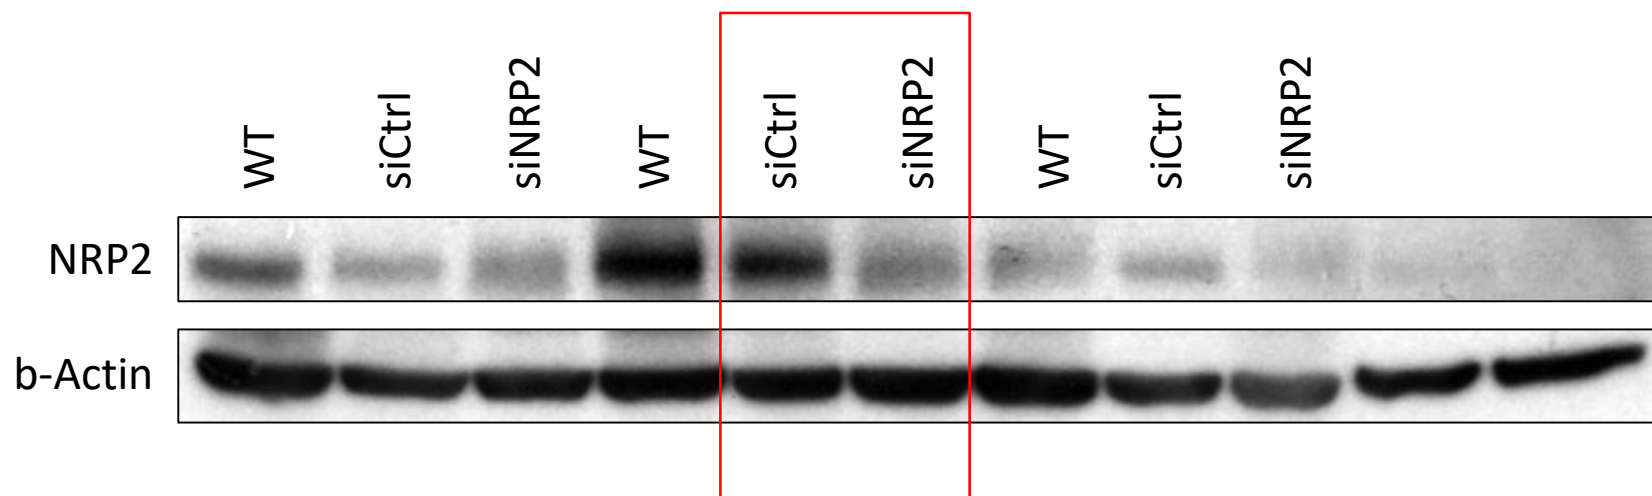

Supplement: Supplementary file 1 — Supplementary Information [file 41598_2019_51881_MOESM1_ESM.pdf]
